# Supplementary material for: Carrier-Mediated Process of Putrescine Elimination at the Rat Blood–Retinal Barrier
Source: MDPI journal article supplement (doi:10.3390/ijms24109003), 2023-05-19
Supplement: s1 [file s1]

Archive with 1 entries (1 files):
- ijms-2395529-supplementary.pdf
